# Supplementary material for: Content-based microarray search using differential expression profiles
Source: Springer Nature journal article supplement (doi:10.1186/1471-2105-11-603), 2010-12-01

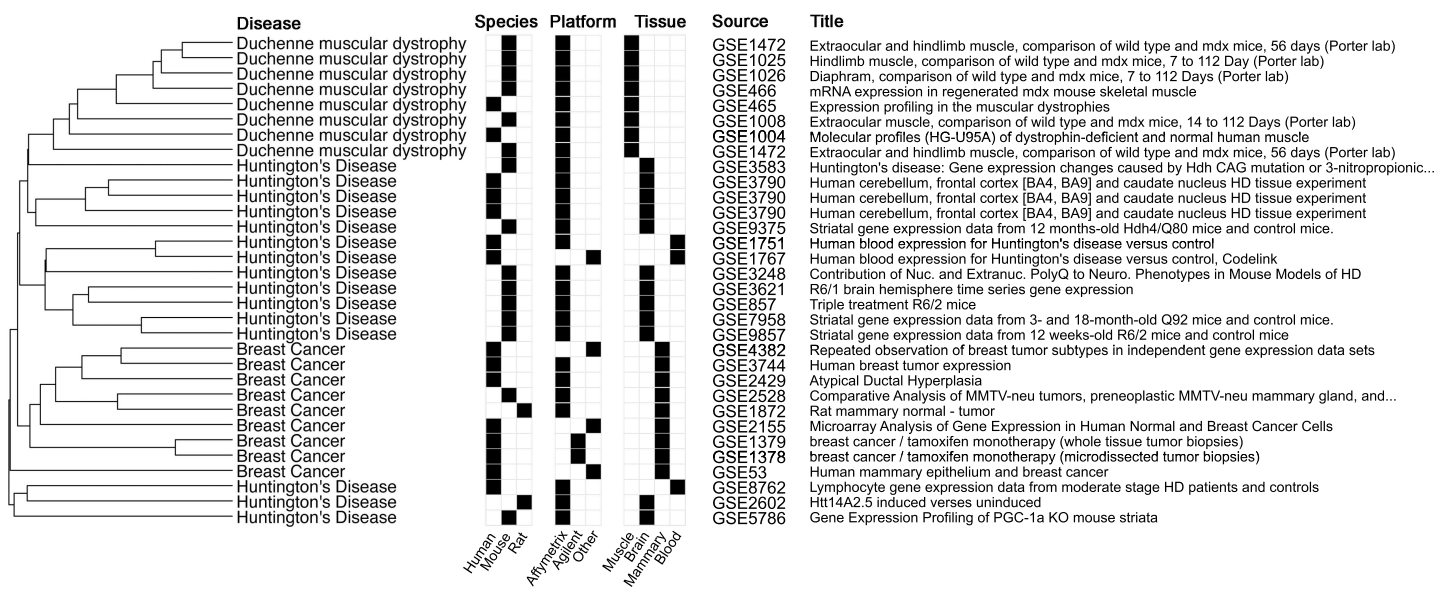

Supplement: 12859_2010_4186_MOESM9_ESM.pdf [file 12859_2010_4186_MOESM9_ESM.pdf]
