# Supplementary material for: Content-based microarray search using differential expression profiles
Source: Springer Nature journal article supplement (doi:10.1186/1471-2105-11-603), 2010-12-01
Supplement: 12859_2010_4186_MOESM12_ESM.pdf [file 12859_2010_4186_MOESM12_ESM.pdf]

| Query: GDS1824 |         | Transcription factors Nanog and Oct4 knockdown effect on embryonic stem cells           |                   |     | ESC (control) vs. ESC (Nanog knockdown) |           |       |         |  |
|----------------|---------|-----------------------------------------------------------------------------------------|-------------------|-----|-----------------------------------------|-----------|-------|---------|--|
| Rank           | GEO     | Title                                                                                   | Subset 1          | vs. | Subset 2                                | Type      | Score | q-value |  |
| 1              | GDS2668 | Embryonic J1 stem cell differentiation in vitro (MG-430A)                               | 24 h              | vs. | 4 d                                     | time      | 0.596 | 0.0054  |  |
| 2              | GDS2668 | Embryonic J1 stem cell differentiation in vitro (MG-430A)                               | 36 h              | vs. | 4 d                                     | time      | 0.565 | 0.0073  |  |
| 3              | GDS2668 | Embryonic J1 stem cell differentiation in vitro (MG-430A)                               | 18 h              | vs. | 4 d                                     | time      | 0.558 | 0.0081  |  |
| 4              | GDS2668 | Embryonic J1 stem cell differentiation in vitro (MG-430A)                               | 24 h              | vs. | 7 d                                     | time      | 0.551 | 0.0087  |  |
| 5              | GDS1823 | Embryonic stem cell differentiation induced by various chemicals: time course           | DMSO              | vs. | HMBA                                    | agent     | 0.539 | 0.0098  |  |
| 6              | GDS2667 | Embryonic R1 stem cell differentiation in vitro (MG-430B)                               | 36 h              | vs. | 7 d                                     | time      | 0.539 | 0.0098  |  |
| 7              | GDS1414 | Candoxin effect on glial cells: time course                                             | 24 h              | vs. | 12 h                                    | time      | 0.521 | 0.011   |  |
| 8              | GDS2666 | Embryonic R1 stem cell differentiation in vitro (MG-430A)                               | 48 h              | vs. | 7 d                                     | time      | 0.518 | 0.011   |  |
| 9              | GDS1823 | Embryonic stem cell differentiation induced by various chemicals: time course           | DMSO              | vs. | RA                                      | agent     | 0.513 | 0.0119  |  |
| 10             | GDS2668 | Embryonic J1 stem cell differentiation in vitro (MG-430A)                               | 18 h              | vs. | 7 d                                     | time      | 0.512 | 0.012   |  |
| 11             | GDS2666 | Embryonic R1 stem cell differentiation in vitro (MG-430A)                               | 36 h              | vs. | 7 d                                     | time      | 0.509 | 0.0122  |  |
| 12             | GDS1733 | Heat shock transcription factor HSF1 depleted cells response to heat shock: time course | 24 h              | vs. | 4 h                                     | time      | 0.505 | 0.0127  |  |
| 13             | GDS2666 | Embryonic R1 stem cell differentiation in vitro (MG-430A)                               | 48 h              | vs. | 9 d                                     | time      | 0.505 | 0.0127  |  |
| 14             | GDS1688 | Various lung cancer cell lines                                                          | small cell cancer | vs. | non-small cell adenocarcinoma           | cell line | 0.491 | 0.0146  |  |
| 15             | GDS2666 | Embryonic R1 stem cell differentiation in vitro (MG-430A)                               | 36 h              | vs. | 9 d                                     | time      | 0.487 | 0.0152  |  |
