# Supplementary material for: Content-based microarray search using differential expression profiles
Source: Springer Nature journal article supplement (doi:10.1186/1471-2105-11-603), 2010-12-01
Supplement: 12859_2010_4186_MOESM14_ESM.pdf [file 12859_2010_4186_MOESM14_ESM.pdf]

| Query: GSE18326 |         |                                                                                                           | Role of FoxO3 in adult neural stem cell maintenance in mice |     | Wild type                   | vs.                 | FoxO3 null |         |  |
|-----------------|---------|-----------------------------------------------------------------------------------------------------------|-------------------------------------------------------------|-----|-----------------------------|---------------------|------------|---------|--|
| Rank            | GEO     | Title                                                                                                     | Subset 1                                                    | vs. | Subset 2                    | Type                | Score      | q-value |  |
| 1               | GDS2106 | Lymphoblastoid cell lines from various CEPH pedigrees                                                     | CEPH pedigree 1444                                          | vs. | CEPH pedigree 1345          | genotype /variation | 0.756      | 0.0013  |  |
| 2               | GDS2758 | Hypoxia and 2-oxoglutarate-dependent dioxygenase inhibition (HG-U133A)                                    | hypoxia                                                     | vs. | normoxia                    | protocol            | 0.746      | 0.0015  |  |
| 3               | GDS2760 | Hypoxia-inducible factor depletion (HG-U133 2.0)                                                          | control                                                     | vs. | HIF-1alpha depletion        | protocol            | 0.730      | 0.0017  |  |
| 4               | GDS2106 | Lymphoblastoid cell lines from various CEPH pedigrees                                                     | CEPH pedigree 1444                                          | vs. | CEPH pedigree 1340          | genotype /variation | 0.723      | 0.0018  |  |
| 5               | GDS2162 | CH1 domain deletion, p300 and CBP heterozygous null mutant hypoxic fibroblasts response to trichostatin A | DP                                                          | vs. | EtOH                        | agent               | 0.722      | 0.0018  |  |
| 6               | GDS998  | Treacher Collins' syndrome Tcof1 gene overexpression and knockdown effect on neuroblastoma cells          | N1E-115 wild type                                           | vs. | N1E-115 Tcof1 overexpressed | cell line           | 0.712      | 0.0021  |  |
| 7               | GDS2106 | Lymphoblastoid cell lines from various CEPH pedigrees                                                     | CEPH pedigree 1447                                          | vs. | CEPH pedigree 1345          | genotype /variation | 0.710      | 0.0022  |  |
| 8               | GDS2106 | Lymphoblastoid cell lines from various CEPH pedigrees                                                     | CEPH pedigree 1447                                          | vs. | CEPH pedigree 1340          | genotype /variation | 0.700      | 0.0024  |  |
| 9               | GDS2760 | Hypoxia-inducible factor depletion (HG-U133 2.0)                                                          | HIF-2alpha depletion                                        | vs. | HIF-1alpha depletion        | protocol            | 0.698      | 0.0024  |  |
| 10              | GDS587  | Myogenic differentiation timecourse (MG-U74C)                                                             | 4 d                                                         | vs. | -2 d                        | time                | 0.694      | 0.0025  |  |
| 11              | GDS3222 | Cytotoxic T cell line response to interleukin-2: time course                                              | 1 h                                                         | vs. | 12 h                        | time                | 0.693      | 0.0025  |  |
| 12              | GDS3222 | Cytotoxic T cell line response to interleukin-2: time course                                              | 1 h                                                         | vs. | 6 h                         | time                | 0.684      | 0.0026  |  |
| 13              | GDS2106 | Lymphoblastoid cell lines from various CEPH pedigrees                                                     | CEPH pedigree 1444                                          | vs. | CEPH pedigree 1341          | genotype /variation | 0.681      | 0.0026  |  |
| 14              | GDS2666 | Embryonic R1 stem cell differentiation in vitro (MG-430A)                                                 | 18 h                                                        | vs. | 6 h                         | time                | 0.671      | 0.0029  |  |
| 15              | GDS3222 | Cytotoxic T cell line response to interleukin-2: time course                                              | 1 h                                                         | vs. | 16 h                        | time                | 0.670      | 0.0029  |  |
